# Supplementary material for: Human Cytomegalovirus IE1 Protein Elicits a Type II Interferon-Like Host Cell Response That Depends on Activated STAT1 but Not Interferon-γ
Source: PLoS Pathog. 2011 Apr 14;7(4):e1002016. doi: 10.1371/journal.ppat.1002016 (PMC3077363; doi:10.1371/journal.ppat.1002016)
Supplement: Table S4 — qRT-PCR analysis of IFN responsiveness of IE1-induced genes. (DOC) [file ppat.1002016.s006.doc]

**Table S4.** qRT-PCR analysis of IFN responsiveness of IE1-induced genes.

| Gene symbol | Treatment1 | Mean Cq value  standard deviation2 |
| --- | --- | --- |
| TUBB | Mock | 18.50  0.03 |
|  | IFN-α | 18.53  0.04 |
|  | IFN- | 18.74  0.05 |
| TNFSF18 | Mock | 25.94  0.24 |
|  | IFN-α | 25.15  0.11 |
|  | IFN- | 25.48  0.19 |
| TNFSF4 | Mock | 23.36  0.15 |
|  | IFN-α | 22.96  0.06 |
|  | IFN- | 23.99  0.10 |
| SERTAD4 | Mock | 28.74  0.04 |
|  | IFN-α | 28.81  0.09 |
|  | IFN- | 28.43  0.08 |
| HES1 | Mock | 29.88  0.15 |
|  | IFN-α | 29.51  0.05 |
|  | IFN- | 28.97  0.13 |
| CCDC3 | Mock | 26.94  0.32 |
|  | IFN-α | 26.80  0.17 |
|  | IFN- | 27.83  0.17 |
| HBG1 | Mock | >36.003 |
|  | IFN-α | >36.00 |
|  | IFN- | >36.00 |
| CCL11 | Mock | 31.08  0.15 |
|  | IFN-α | 31.00  0.18 |
|  | IFN- | 30.06  0.11 |

1 TetR cells were treated with solvent (Mock), 1000 U/ml IFN-α, or 10 ng/ml IFN-.

2 Two biological and two technical replicates were analyzed (Cq, quantification cycle).

3 Mean Cq value  standard deviation of TetR-IE1 cells: 26.98  0.13.
